# Supplementary material
Source: PubMed Central journal article supplement (PMC3228462)
Supplement: 1112801108_pnas.201112801SI.pdf [file 1112801108_pnas.201112801SI.pdf]

# Supporting Information

Miletich et al. 10.1073/pnas.1112801108

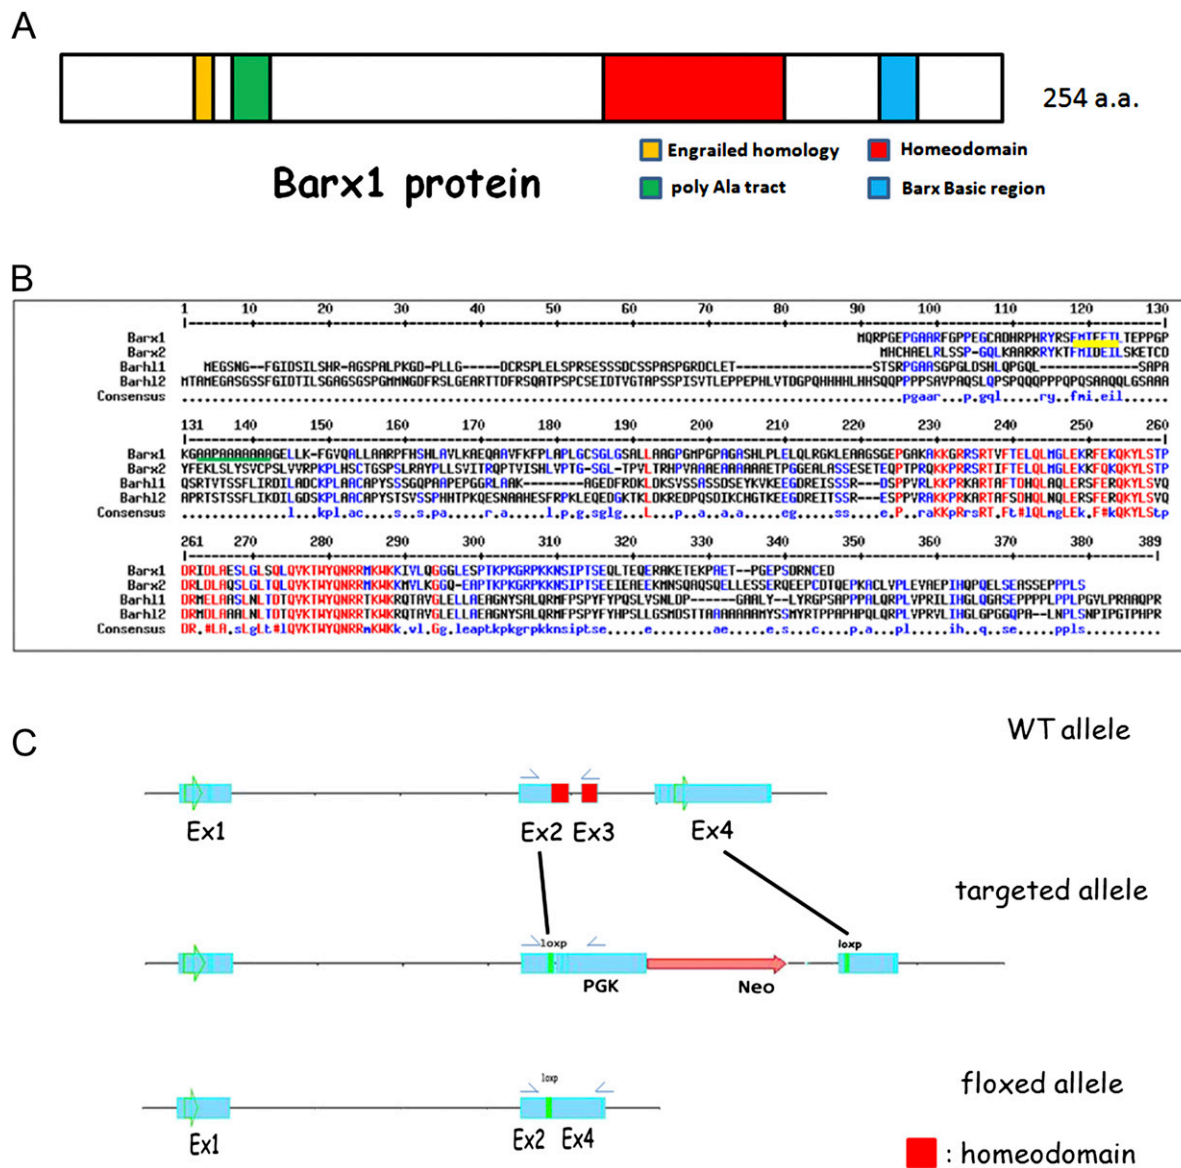

**Fig. S1.** Generation of *Barx1* knockout mice. (A) Schematic representation of Barx1 protein showing localization of conserved domains. (B) Homeodomain of Barx1 is 95.2% identical to Barx2 and 72.6% to Barh1 and Barh12. There are other homologous regions between Barx1 and Barx2 such as the Engrailed homology domain and the Barx basic region (BBR). (C) *Barx1* locus was targeted with a PGK-Neo cassette to replace exon 2–exon 4 of the gene in a 129Sv BAC clone, leading to the deletion of the whole homeodomain and the BBR. To verify that the targeted mutation resulted in a null allele, we used a riboprobe that recognized the 3' end of the nontargeted Barx1-encoding region to detect any mRNA expression during embryo development. mRNA-encoding *Barx1* homeodomain and BBR was no longer expressed in the *Barx1* mutant mice at E10.5. *Barx1* mutants were recovered from the intercross matings at the expected Mendelian ratio until birth and all *Barx1* KO pups died shortly after birth due to a fully penetrant cleft palate phenotype. To eliminate the possibility that the neo cassette in the targeted allele might interfere with Barx1 function, we crossed the mice with  $\beta$ -actin-Cre mice. The resulting *Barx1*<sup>-/-</sup>/*Neo*<sup>-/-</sup> animals were indistinguishable from *Barx1*<sup>-/-</sup>/*Neo*<sup>+/+</sup>.

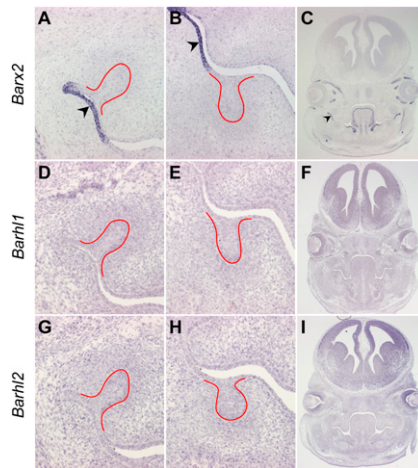

**Fig. S2.** Expression of *Barx2*, *Barhl1*, and *Barhl2* at E13.5 in molar tooth buds and other craniofacial structures at the level of the first molars. In situ hybridization for *Barx2* (A–C), *Barhl1* (D–F), and *Barhl2* (G–I) on frontal sections of E13.5 WT heads. (A) *Barx2* is not expressed in upper (A) and lower (B) molar tooth buds, although it is expressed in the oral epithelium flanking the lower first molar on the buccal side (A–C, arrowhead). Only background staining can be observed at the level of the first molars with *Barhl1* (D and E) and *Barhl2* (G and H) riboprobes. However, expression of *Barhl1* and *Barhl2* can be detected in the brain (F and I) as previously reported (1, 2). Upper and lower first molar tooth buds are outlined in red.

1. Bulfone A, et al. (2000) *Barhl1*, a gene belonging to a new subfamily of mammalian homeobox genes, is expressed in migrating neurons of the CNS. *Hum Mol Genet* 9:1443–1452.
2. Mo Z, Li S, Yang X, Xiang M (2004) Role of the *Barhl2* homeobox gene in the specification of glycinergic amacrine cells. *Development* 131:1607–1618.
